# Supplementary material for: The Course of Circulating Small Extracellular Vesicles in Patients Undergoing Surgical Aortic Valve Replacement
Source: Hindawi journal article supplement (doi:10.1155/2020/6381396), 2020-01-01
Supplement: f1 [file 6381396.f1.pdf]

## Supplementary information

The course of circulating small extracellular vesicles in patients undergoing surgical aortic valve replacement

Andreas Weber<sup>1</sup>, Shining Sophie Liu<sup>1</sup>, Letizia Cardone<sup>1</sup>, Philipp Rellecke<sup>1</sup>, Stephan Sixt<sup>2</sup>, Artur Lichtenberg<sup>1\*</sup>, Payam Akhyari<sup>1</sup>

<sup>1</sup> Department of Heart Surgery, Heinrich-Heine-University, Medical Faculty, Düsseldorf, Germany

<sup>2</sup> Department of Anaesthesiology, Heinrich-Heine-University, Medical Faculty, Düsseldorf, Germany

**\* Corresponding author:** Artur Lichtenberg

**Mailing address:** Department of Cardiovascular Surgery  
Heinrich-Heine-University, Medical Faculty  
Moorenstraße 5  
40225 Düsseldorf  
Germany  
phone: +49-(0)211-8118331  
fax:+49-(0)211-8118333  
e-mail: [Artur.Lichtenberg@med.uni-duesseldorf.de](mailto:Artur.Lichtenberg@med.uni-duesseldorf.de)

**Table S1: Acquisition parameters for nanoparticle tracking analysis.**

| <b>Acquisition parameters</b>            |          |
|------------------------------------------|----------|
| Sensitivity [%]                          | 70       |
| Shutter                                  | 70       |
| Min. Brightness                          | 20       |
| Max Size [nm]                            | 500      |
| Min. Size [nm]                           | 20       |
| Polarity                                 | Negative |
| Voltage                                  | Off      |
| Particle Drift at 0V [ $\mu\text{m/s}$ ] | < 20     |
| Positions                                | 11       |
| Cycles                                   | 10       |
| Multiple acquisitions                    | 3        |
| Time Delay [min]                         | 0        |

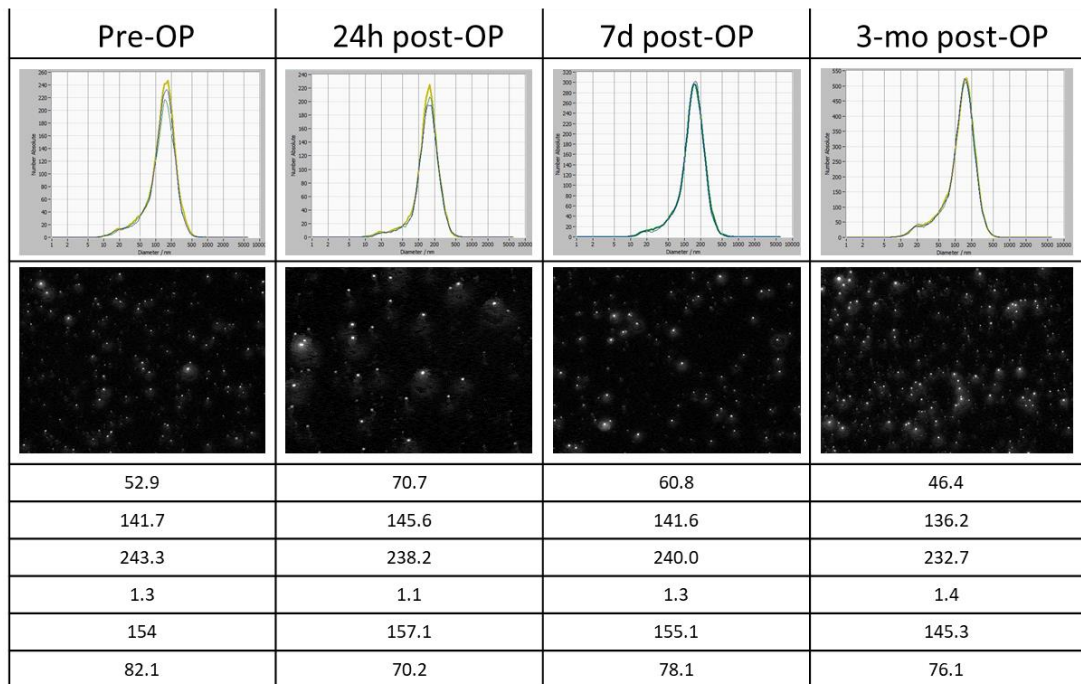

**S1 Fig.: NTA analysis of sEVs.** Size distribution curves and representative images as well as descriptive statistics (means of all patients) of the captured sEVs for each time point of one patient.

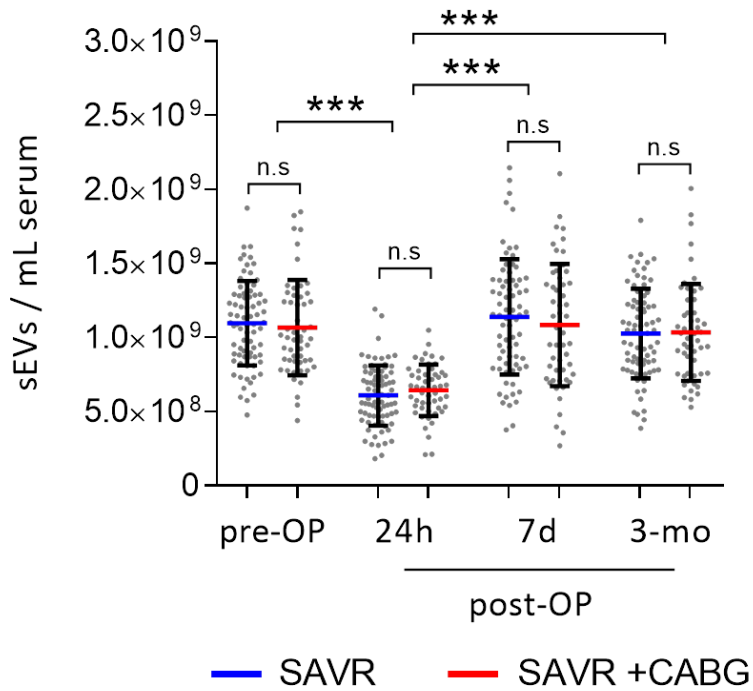

**S2 Fig.: Serum levels of circulating sEVs.** Comparison of sEVs of patients receiving SAVR with (red line) or without concomitant coronary artery bypass grafting (blue line) measured at four time points. pre-OP, sample from the day prior to operation; 24h post-OP, sample from the first postoperative day; 7d post-OP, sample taken on 7<sup>th</sup> postoperative day; and 3-mo post-OP, sample taken on the occasion of follow-up analysis three months after surgery. Mean  $\pm$  SD; \*\*\*  $p < 0.001$ .

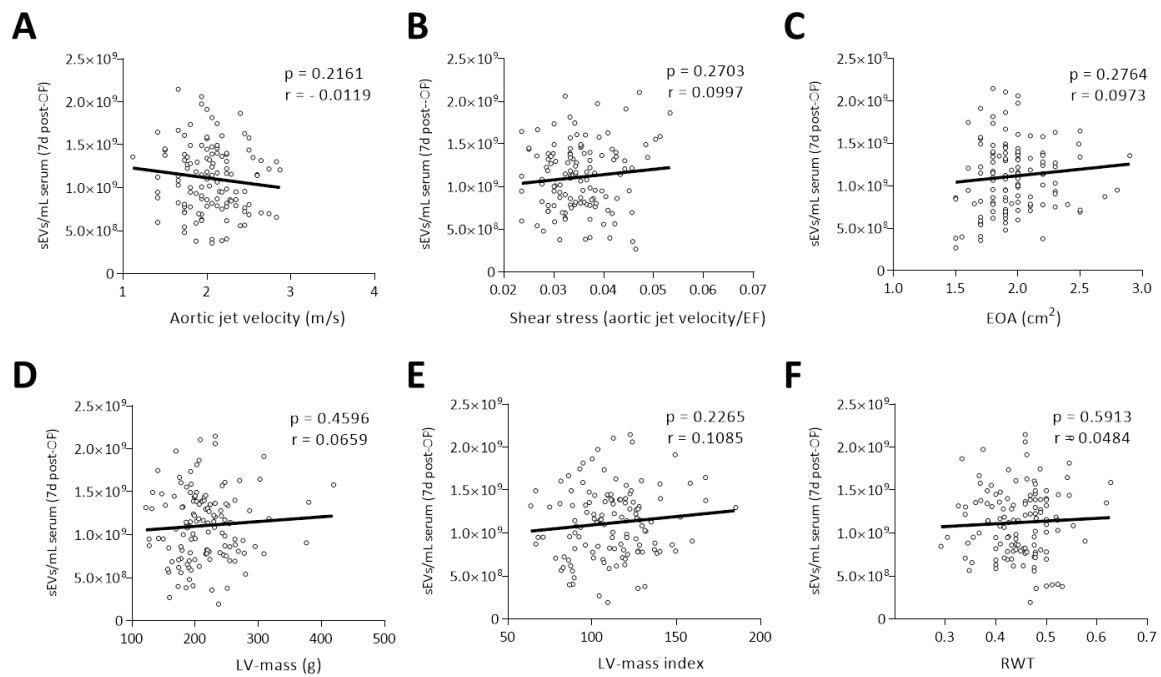

**S3 Fig.: Correlation of circulating sEVs with echocardiographic parameters 7d after SAVR.**

Linear regression of sEVs with aortic jet velocity (A), shear stress at the level of the aortic valve (B), effective orifice area (C), LV-mass (D), LV-mass index (E) and relative wall thickness (F) 7d after SAVR.

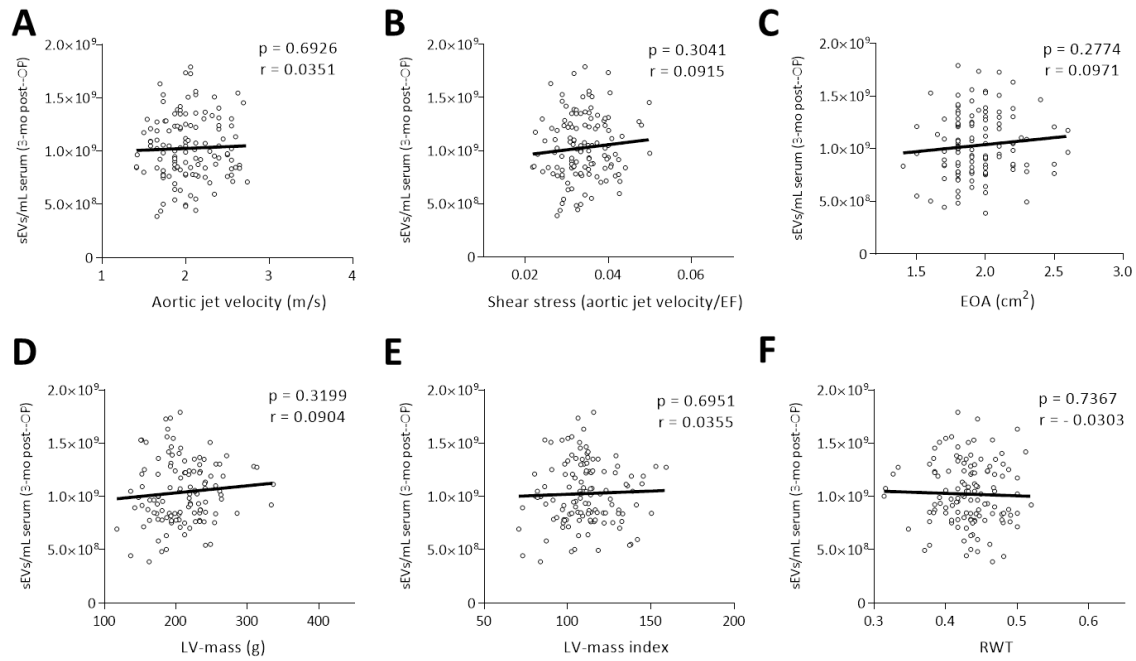

**S4 Fig.: Correlation of circulating sEVs with echocardiographic parameters at follow-up three months after SAVR.** Linear regression of sEVs with aortic jet velocity (A), shear stress at the level of the aortic valve (B), effective orifice area (C), LV-mass (D), LV-mass index (E) and relative wall thickness (F) 3-mo after SAVR.

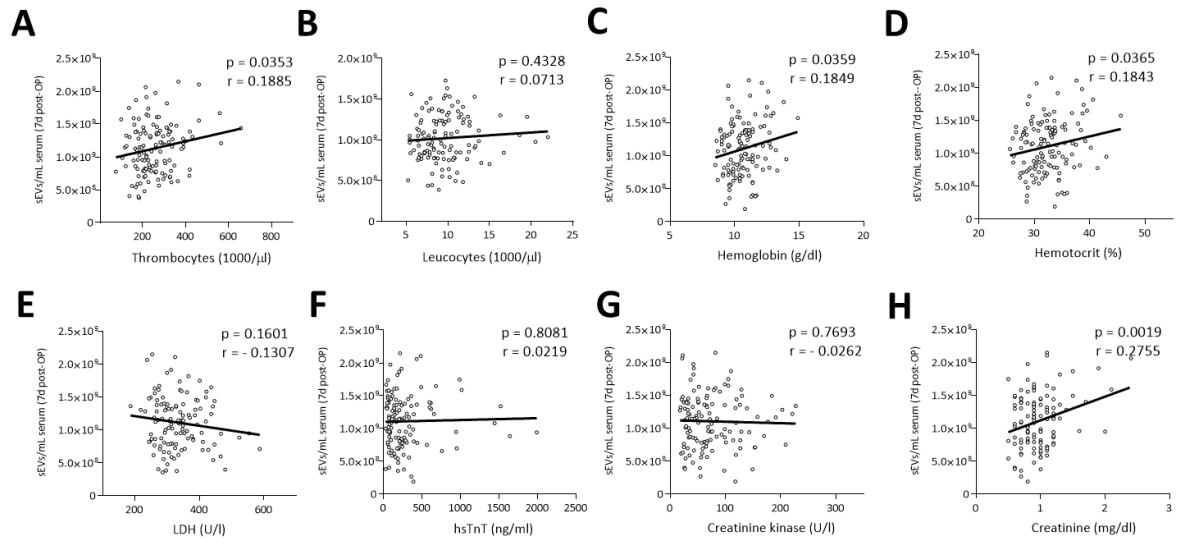

**S5 Fig.: Correlation of circulating sEVs with laboratory parameters 7 days after SAVR.**

Linear regression of sEVs with thrombocytes (A), leucocytes (B), hemoglobin (C), hematocrit (D), lactate dehydrogenase (E), high sensitive troponin T (F), creatinine kinase (G) and creatinine (H) 7 d after SAVR.

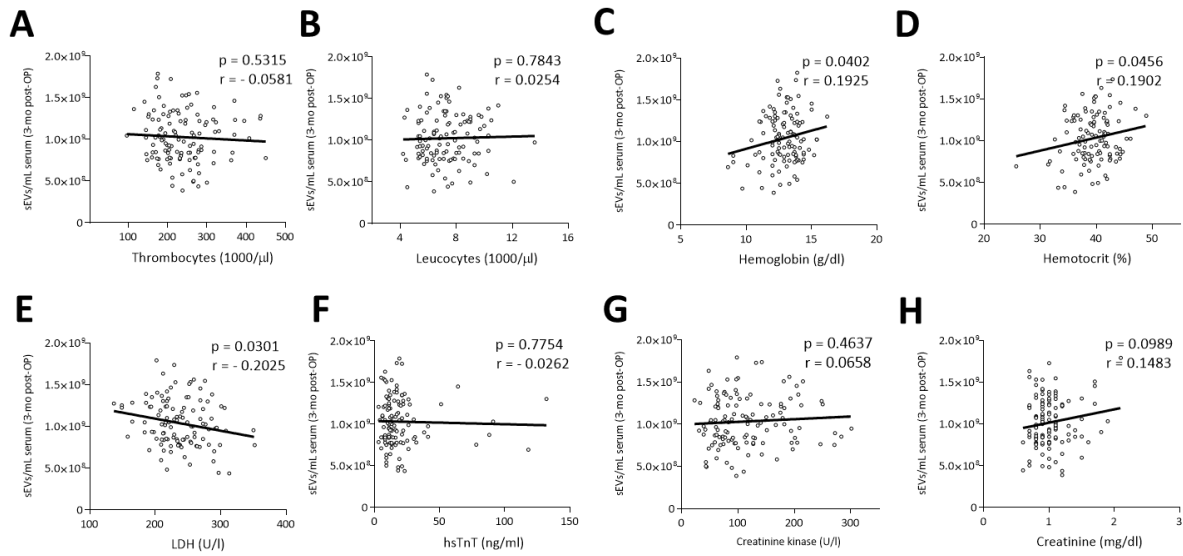

**S6 Fig.:** Correlation of circulating sEVs levels with laboratory parameters at follow-up three months after SAVR. Linear regression of sEVs with thrombocytes (A), leucocytes (B), haemoglobin (C), haematocrit (D), lactate dehydrogenase (E), high sensitive troponin T (F), creatinine kinase (G) and creatinine (H) 3-mo after SAVR.



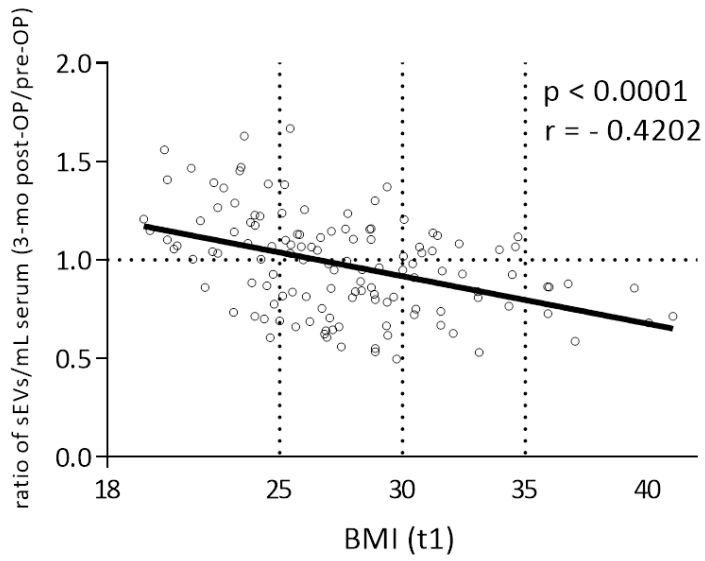

**S7 Fig.: Correlation of sEV ratios with BMI.** Linear regression of sEV ratios with BMI in patients undergoing SAVR. Ratio of sEVs represents the levels of circulating sEVs at 3-mo post-OP divided by the respective pre-OP value. BMI, body mass index.
